# Supplementary material
Source: ML conference proceedings conference paper supplement (https://openaccess.thecvf.com/content/CVPR_2019/html/Shi_Curls__Whey_CVPR_2019_paper.html)
Supplement: Supplementary file 1 [file Shi_Curls__Whey_CVPR_2019_supplemental.pdf]

# Curls & Whey: Boosting Black-Box Adversarial Attacks

## Supplemental Material

Yucheng Shi, Siyu Wang, Yahong Han  
College of Intelligence and Computing  
Tianjin University, Tianjin, China

{yucheng, syuwang, yahong}@tju.edu.cn

In this supplemental material, we show additional experimental results and more adversarial examples generated by Curls & Whey attack, including tables of untargeted black-box attack on Imagenet [4] and targeted black-box attack on Tiny-Imagenet. Adversarial examples generated on two datasets are listed behind.

### A. Untargeted Attack

In Table 1, we report median and average  $\ell_2$  distance of adversarial perturbations crafted on Imagenet dataset. Four DNN models with different structures are compared: resnet-101 [1], densenet-161 [3], vgg19-bn [5] and senet-154 [2]. In this  $4 \times 4$  matrix, each element represents the result of substitute model of this row against the target model of this column over the entire  $1000 \times 10$  images collected from validate set of Imagenet, 10 images for each category. We compare our Curls & Whey attack with four other attack methods, FGSM, I-FGSM, MI-FGSM and vr-IGSM. As can be seen, Curls & Whey achieves smaller median noise magnitude in  $\ell_2$  norm than other methods on black-box attacks (off-diagonal elements). Because of the gaussian noises introduced, our method as well as vr-IGSM perform not so well on white-box results (diagonal elements), where transferability is guaranteed to be 100%. Fig. 1 illustrates adversarial examples crafted by different attacks. The leftmost images in Fig. 1 are original images. Noise magnitude in  $\ell_2$  norm is placed below each adversarial example.

### B. Targeted Attack

In Table 2, we provide median and average adversarial perturbation on  $200 \times 10$  images collected from Tiny-Imagenet dataset, 10 images for each category. Four DNN models are compared: resnet-18, inception V3 [7], inception-resnet V2 [6] and nasnet [8]. As we can see, the performance of Curls & Whey is far beyond other methods. Results of iterative attacks like I-FGSM, MI-FGSM and vr-IGSM are all around 80, which means these methods seldom successfully achieve targeted misclassification with

small  $\ell_2$  distance. Three decision based attacks, boundary attack, pointwise attack and vanilla interpolation are also compared. These methods do not rely on substitute model, but collect a legitimate image that can be classified into the target category by the target model first and then search between original image and this image. Our method significantly reduces the noise magnitude of targeted attack in black-box scenario. Several groups of targeted adversarial examples are shown in Fig. 2, where original image, image of target category, noise and targeted adversarial example are listed from left to right in each group.

### References

- [1] Kaiming He, Xiangyu Zhang, Shaoqing Ren, and Jian Sun. Deep residual learning for image recognition. In *CVPR*, pages 770–778, 2016. 1
- [2] Jie Hu, Li Shen, and Gang Sun. Squeeze-and-excitation networks. *arXiv preprint arXiv:1709.01507*, 2017. 1
- [3] Gao Huang, Zhuang Liu, and Kilian Q. Weinberger. Densely connected convolutional networks. *CVPR*, pages 2261–2269, 2017. 1
- [4] Olga Russakovsky, Jia Deng, Hao Su, Jonathan Krause, Sanjeev Sathesh, Sean Ma, Zhiheng Huang, Andrej Karpathy, Aditya Khosla, Michael Bernstein, et al. Imagenet large scale visual recognition challenge. *International Journal of Computer Vision*, 115(3):211–252, 2015. 1
- [5] K. Simonyan and A. Zisserman. Very deep convolutional networks for large-scale image recognition. In *ICLR*, 2015. 1
- [6] Christian Szegedy, Sergey Ioffe, Vincent Vanhoucke, and Alexander A Alemi. Inception-v4, inception-resnet and the impact of residual connections on learning. In *AAAI*, volume 4, page 12, 2017. 1
- [7] Christian Szegedy, Vincent Vanhoucke, Sergey Ioffe, Jon Shlens, and Zbigniew Wojna. Rethinking the inception architecture for computer vision. In *Proceedings of the IEEE Conference on Computer Vision and Pattern Recognition*, pages 2818–2826, 2016. 1
- [8] Barret Zoph, Vijay Vasudevan, Jonathon Shlens, and Quoc V. Le. Learning transferable architectures for scalable image recognition. *CoRR*, abs/1707.07012, 2017. 1

Table 1. Median and average  $\ell_2$  distance of adversarial perturbation for untargeted attack on Imagenet.

|              |                | resnet-101    |               | densenet-161  |               | vgg19-bn      |               | senet-154     |               |
|--------------|----------------|---------------|---------------|---------------|---------------|---------------|---------------|---------------|---------------|
|              | attack methods | median        | average       | median        | average       | median        | average       | median        | average       |
| resnet-101   | FGSM           | 0.3167        | 3.9776        | 6.7431        | 16.5051       | 6.0534        | 15.1296       | 7.9076        | 15.6174       |
|              | I-FGSM         | <b>0.2045</b> | 0.4065        | 2.0577        | 3.8353        | 1.9820        | 4.0847        | 3.5190        | 6.5371        |
|              | MI-FGSM        | 0.2305        | <b>0.2864</b> | 2.2312        | 4.3944        | 2.2569        | 5.1220        | 4.1914        | 8.1522        |
|              | vr-IGSM        | 0.2390        | 0.2940        | 1.9114        | 3.7779        | 1.8940        | 4.3436        | 3.3970        | 7.0107        |
|              | Curls&Whey     | 0.2295        | 0.5198        | <b>1.8655</b> | <b>3.5871</b> | <b>1.7285</b> | <b>3.5187</b> | <b>2.9872</b> | <b>5.3745</b> |
| densenet-161 | FGSM           | 6.5304        | 15.3936       | 0.3070        | 4.2659        | 5.3533        | 13.0053       | 6.8372        | 14.5869       |
|              | I-FGSM         | 1.8307        | 3.8534        | <b>0.2173</b> | 0.5338        | 1.7311        | 3.6356        | 2.8061        | 5.2298        |
|              | MI-FGSM        | 1.9436        | 4.2498        | 0.2258        | 0.2051        | 1.9164        | 4.4277        | 3.2574        | 6.3578        |
|              | vr-IGSM        | 1.8994        | 3.7641        | 0.2576        | <b>0.1834</b> | 1.6656        | 3.8322        | 2.7925        | 5.6133        |
|              | Curls&Whey     | <b>1.7041</b> | <b>3.3246</b> | 0.2494        | 0.7397        | <b>1.5771</b> | <b>3.1351</b> | <b>2.4977</b> | <b>4.4188</b> |
| vgg19-bn     | FGSM           | 9.9305        | 19.8893       | 8.7631        | 16.3457       | 0.1819        | 2.2736        | 11.2227       | 23.8974       |
|              | I-FGSM         | 4.2179        | 8.7935        | 3.9970        | 7.5216        | <b>0.1406</b> | 0.8352        | 4.5875        | 8.7350        |
|              | MI-FGSM        | 4.5438        | 9.9437        | 4.1861        | 8.3386        | 0.1468        | 0.2462        | 5.3552        | 10.2055       |
|              | vr-IGSM        | 3.6475        | 8.3765        | 3.4204        | 6.9270        | 0.1537        | <b>0.2357</b> | 4.2161        | 8.7974        |
|              | Curls&Whey     | <b>3.3500</b> | <b>6.9225</b> | <b>3.2049</b> | <b>6.3321</b> | 0.1511        | 0.8173        | <b>3.6962</b> | <b>7.1415</b> |
| senet-154    | FGSM           | 8.3359        | 15.4190       | 8.3936        | 15.1964       | 7.9624        | 14.7991       | 0.6791        | 5.9169        |
|              | I-FGSM         | 4.2529        | 7.9353        | 4.1996        | 7.4578        | 2.4439        | 4.8991        | 0.3478        | 0.9178        |
|              | MI-FGSM        | 4.5414        | 9.9268        | 4.5520        | 9.6595        | 2.9568        | 6.6679        | 0.4465        | 0.4386        |
|              | vr-IGSM        | 3.4674        | 8.4754        | 3.5301        | 8.3745        | 2.5631        | 5.9603        | 0.3226        | 0.7623        |
|              | Curls&Whey     | <b>3.0064</b> | <b>5.8348</b> | <b>3.0913</b> | <b>5.5426</b> | <b>1.9326</b> | <b>3.6826</b> | <b>0.2665</b> | <b>0.4206</b> |

Table 2. Median and average  $\ell_2$  distance of adversarial perturbation for targeted attack on Tiny-Imagenet.

|               |               | resnet-18      |                | inception V3   |                | inc-resnet V2 |               | nasnet        |               |
|---------------|---------------|----------------|----------------|----------------|----------------|---------------|---------------|---------------|---------------|
| resnet-18     | FGSM          | 81.2735        | 72.7756        | 82.5241        | 80.9782        | 82.5322       | 81.0193       | 82.5626       | 80.9734       |
|               | I-FGSM        | 1.5398         | 2.9277         | 81.2345        | 70.4633        | 80.9559       | 70.9525       | 81.9787       | 76.3114       |
|               | MI-FGSM       | 5.4267         | 34.7935        | 80.9999        | 68.6765        | 80.6864       | 68.8399       | 81.6331       | 73.6505       |
|               | vr-IGSM       | <b>0.3751</b>  | <b>0.4328</b>  | 80.9087        | 68.7406        | 80.6796       | 67.6213       | 81.6413       | 73.5731       |
|               | Interpolation | 27.1537        | 28.0997        | 24.8444        | 25.2685        | 24.0634       | 24.9918       | 24.2808       | 24.9455       |
|               | Pointwise     | 40.0754        | 40.8887        | 39.8188        | 40.4638        | 39.9544       | 40.6741       | 40.0107       | 40.6636       |
|               | Boundary      | 31.7736        | 32.5285        | 31.2757        | 31.8612        | 31.5086       | 32.0049       | 31.4495       | 32.0101       |
|               | Curls&Whey    | 2.9242         | 3.5819         | <b>9.3365</b>  | <b>9.8224</b>  | <b>9.1087</b> | <b>9.6767</b> | <b>9.2421</b> | <b>9.8868</b> |
| inception V3  | FGSM          | 82.5945        | 81.4726        | 82.5049        | 80.1433        | 82.4776       | 80.8414       | 82.6294       | 81.7538       |
|               | I-FGSM        | 81.7994        | 76.8168        | <b>0.3668</b>  | <b>0.4005</b>  | 80.6272       | 66.7824       | 81.8072       | 75.4738       |
|               | MI-FGSM       | 81.7709        | 75.286         | 0.6941         | 0.787          | 80.6065       | 65.7128       | 81.2065       | 71.1222       |
|               | vr-IGSM       | 81.5944        | 73.4011        | 0.7074         | 0.7944         | 80.5404       | 64.9861       | 81.6332       | 71.7732       |
|               | Interpolation | 27.1537        | 28.0997        | 24.8444        | 25.2685        | 24.0634       | 24.9918       | 24.2808       | 24.9455       |
|               | Pointwise     | 40.0754        | 40.8887        | 39.8188        | 40.4638        | 39.9544       | 40.6741       | 40.0107       | 40.6636       |
|               | Boundary      | 31.7736        | 32.5285        | 31.2757        | 31.8612        | 31.5086       | 32.0049       | 31.4495       | 32.0101       |
|               | Curls&Whey    | <b>9.3832</b>  | <b>10.2564</b> | 1.2996         | 1.9423         | <b>7.0783</b> | <b>7.8715</b> | <b>7.9913</b> | <b>8.7716</b> |
| inc-resnet V2 | FGSM          | 82.5945        | 81.1598        | 82.4787        | 80.9113        | 82.4778       | 80.6907       | 82.5397       | 81.4183       |
|               | I-FGSM        | 81.8539        | 76.5748        | 80.5121        | 66.4706        | <b>0.5139</b> | <b>1.8753</b> | 81.7709       | 74.8515       |
|               | MI-FGSM       | 81.7926        | 75.2021        | 80.6945        | 66.7647        | 1.5027        | 2.0268        | 81.4114       | 71.1565       |
|               | vr-IGSM       | 81.5944        | 74.2181        | 80.6342        | 66.0386        | 1.5101        | 2.0193        | 82.3142       | 75.3981       |
|               | Interpolation | 27.1537        | 28.0997        | 24.8444        | 25.2685        | 24.0634       | 24.9918       | 24.2808       | 24.9455       |
|               | Pointwise     | 40.0754        | 40.8887        | 39.8188        | 40.4638        | 39.9544       | 40.6741       | 40.0107       | 40.6636       |
|               | Boundary      | 31.7736        | 32.5285        | 31.2757        | 31.8612        | 31.5086       | 32.0049       | 31.4495       | 32.0101       |
|               | Curls&Whey    | <b>9.4622</b>  | <b>10.0514</b> | <b>7.7449</b>  | <b>8.3226</b>  | 2.6911        | 3.0239        | <b>7.5282</b> | <b>8.2552</b> |
| nasnet        | FGSM          | 82.5626        | 81.3046        | 82.5626        | 81.4469        | 82.4840       | 81.0555       | 82.4787       | 80.6151       |
|               | I-FGSM        | 81.6910        | 75.8341        | 79.8133        | 64.4298        | 79.9032       | 65.0252       | <b>0.3363</b> | <b>0.3741</b> |
|               | MI-FGSM       | 81.6249        | 74.6014        | 80.5495        | 67.4740        | 79.8082       | 63.0784       | 0.6785        | 0.7839        |
|               | vr-IGSM       | 81.6166        | 74.2587        | 80.5220        | 66.5961        | 79.7085       | 62.8439       | 0.7582        | 0.8575        |
|               | Interpolation | 27.1537        | 28.0997        | 24.8444        | 25.2685        | 24.0634       | 24.9918       | 24.2808       | 24.9455       |
|               | Pointwise     | 40.0754        | 40.8887        | 39.8188        | 40.4638        | 39.9544       | 40.6741       | 40.0107       | 40.6636       |
|               | Boundary      | 31.7736        | 32.5285        | 31.2757        | 31.8612        | 31.5086       | 32.0049       | 31.4495       | 32.0101       |
|               | Curls&Whey    | <b>11.1441</b> | <b>11.867</b>  | <b>8.25630</b> | <b>8.70140</b> | <b>6.9883</b> | <b>7.6393</b> | 1.3578        | 1.9226        |

| original                                                                                          | FGSM                                                                                                                   | I-FGSM                                                                                                            | MI-FGSM                                                                                                             | vr-IGSM                                                                                                               | Curls&Whey                                                                                                                |
|---------------------------------------------------------------------------------------------------|------------------------------------------------------------------------------------------------------------------------|-------------------------------------------------------------------------------------------------------------------|---------------------------------------------------------------------------------------------------------------------|-----------------------------------------------------------------------------------------------------------------------|---------------------------------------------------------------------------------------------------------------------------|
| <br>white shark  | <br>goldfish<br>$l_2 = 5.8269$        | <br>goldfish<br>$l_2 = 0.9121$   | <br>goldfish<br>$l_2 = 0.9375$     | <br>goldfish<br>$l_2 = 0.8967$     | <br>goldfish<br>$l_2 = 0.8324$         |
| <br>crampfish    | <br>eel<br>$l_2 = 45.0341$            | <br>stingray<br>$l_2 = 3.4814$   | <br>stingray<br>$l_2 = 3.8821$     | <br>stingray<br>$l_2 = 3.6347$     | <br>stingray<br>$l_2 = 3.3096$         |
| <br>cock         | <br>hen<br>$l_2 = 27.9184$            | <br>hen<br>$l_2 = 4.8635$        | <br>hen<br>$l_2 = 6.1862$          | <br>hen<br>$l_2 = 5.2485$          | <br>hen<br>$l_2 = 4.4770$              |
| <br>ostrich    | <br>maypole<br>$l_2 = 33.9738$      | <br>vulture<br>$l_2 = 7.0560$  | <br>vulture<br>$l_2 = 12.5591$   | <br>vulture<br>$l_2 = 13.4132$   | <br>vulture<br>$l_2 = 6.9842$        |
| <br>chickadee  | <br>humming bird<br>$l_2 = 14.8459$ | <br>magpie<br>$l_2 = 4.6537$   | <br>magpie<br>$l_2 = 5.1470$     | <br>magpie<br>$l_2 = 5.1279$     | <br>indigo bunting<br>$l_2 = 3.9699$ |
| <br>mud turtle | <br>armadillo<br>$l_2 = 41.9588$    | <br>terrapin<br>$l_2 = 4.1295$ | <br>loggerhead<br>$l_2 = 3.8689$ | <br>loggerhead<br>$l_2 = 4.6041$ | <br>terrapin<br>$l_2 = 3.1625$       |

Figure 1. Six groups of untargeted attack examples on Imagenet. Columns from left to right show original image and the adversarial examples generated by five different methods. The misclassification category and  $l_2$  norm of the noise are below each image.



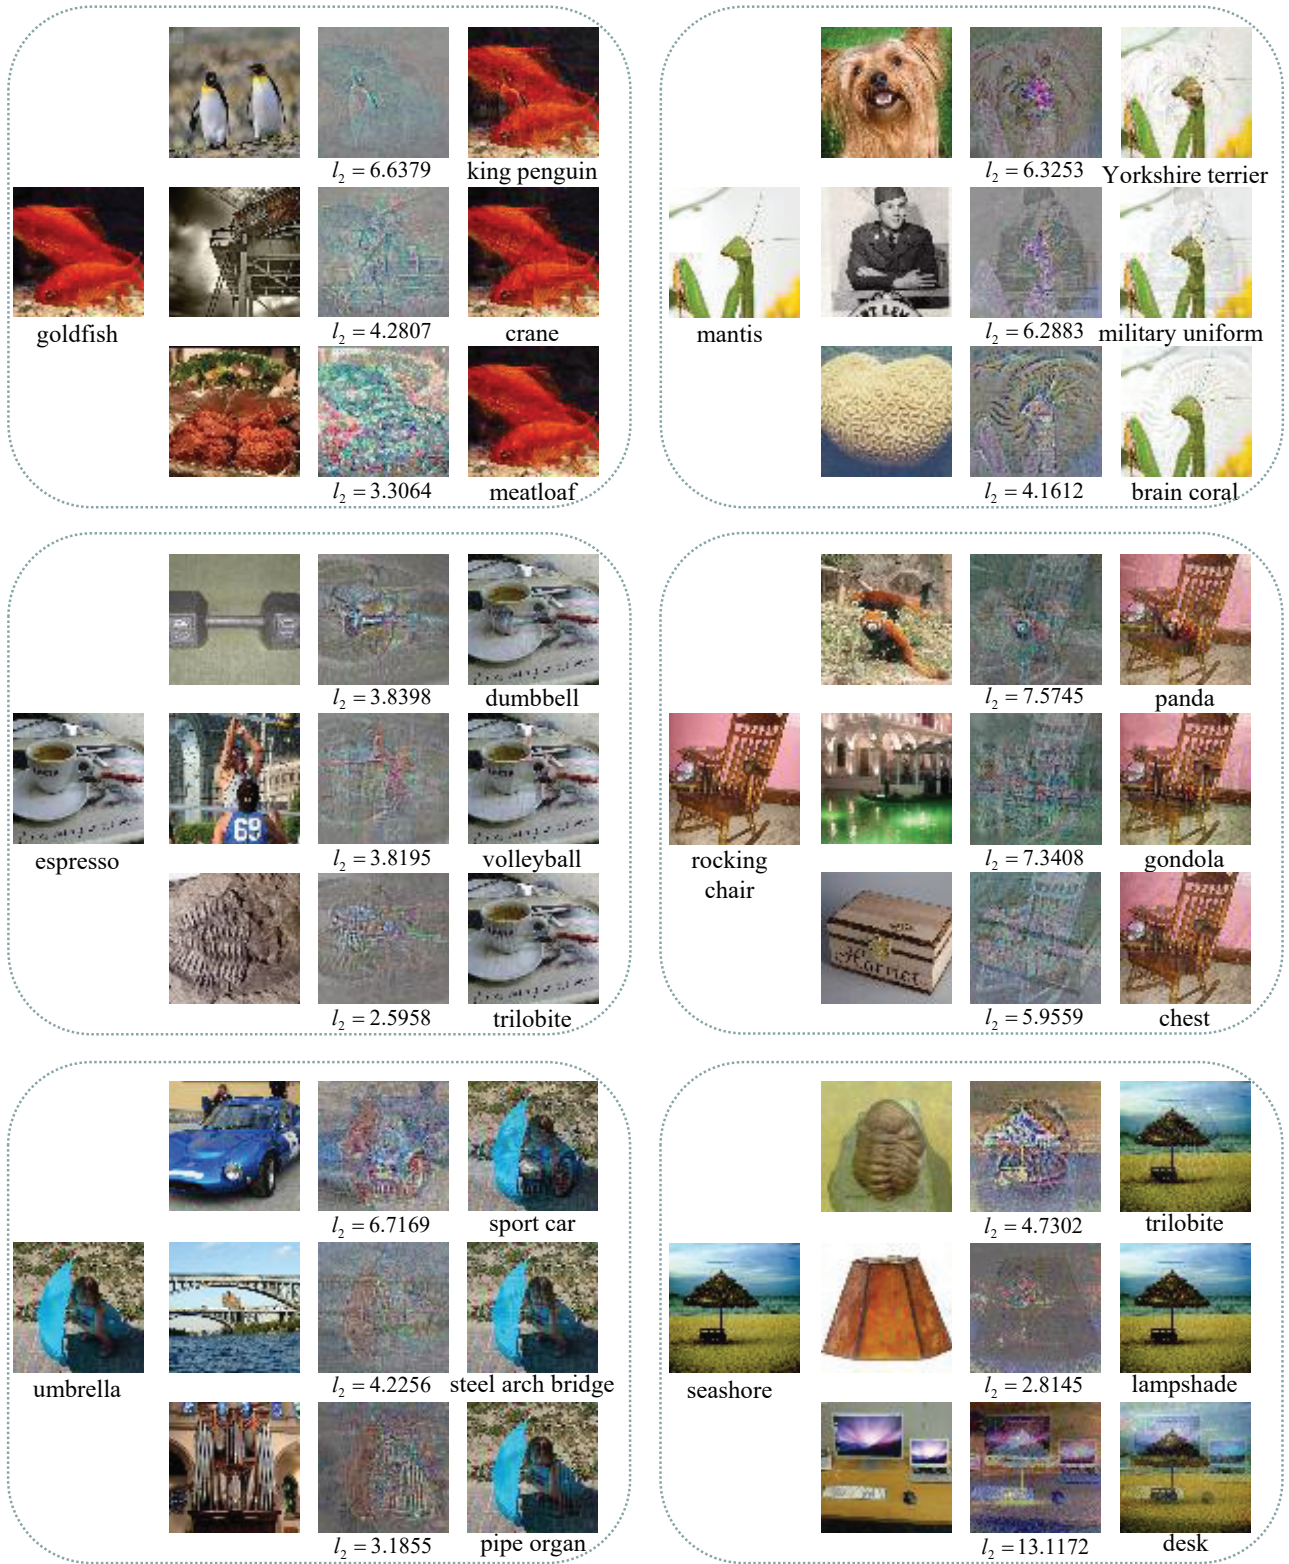

Figure 2. Six groups of targeted attack examples on Tiny-Imagenet. Original image, images of target category, noises and adversarial examples are listed from left to right in each group. By adding three different noises, each original image is misclassified into three other categories.
